# Supplementary material for: Exploiting TLK1 and Cisplatin Synergy for Synthetic Lethality in Androgen-Insensitive Prostate Cancer
Source: MDPI journal article supplement (doi:10.3390/biomedicines11112987), 2023-11-07

# Figure S1

Midpoint treatment group with 3mg/kg CPT+J54

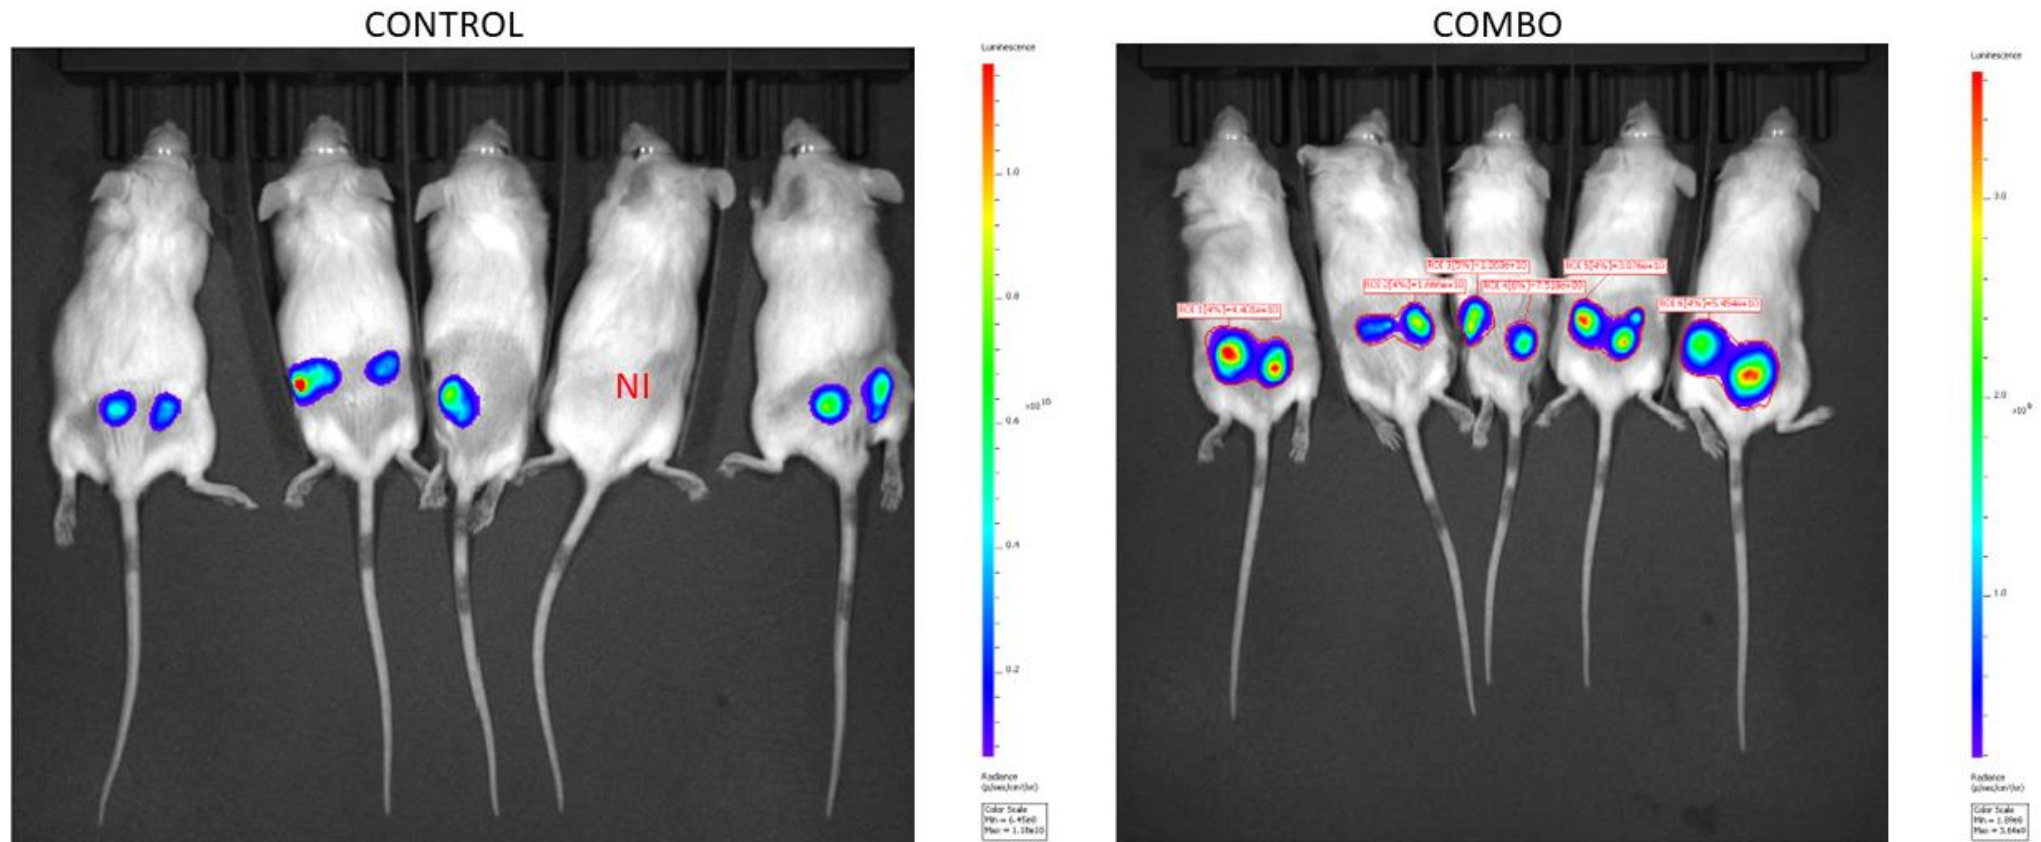

Figure S2. Phospho-NEK1 status and Cl-CAS3 in tumors from the treatment groups

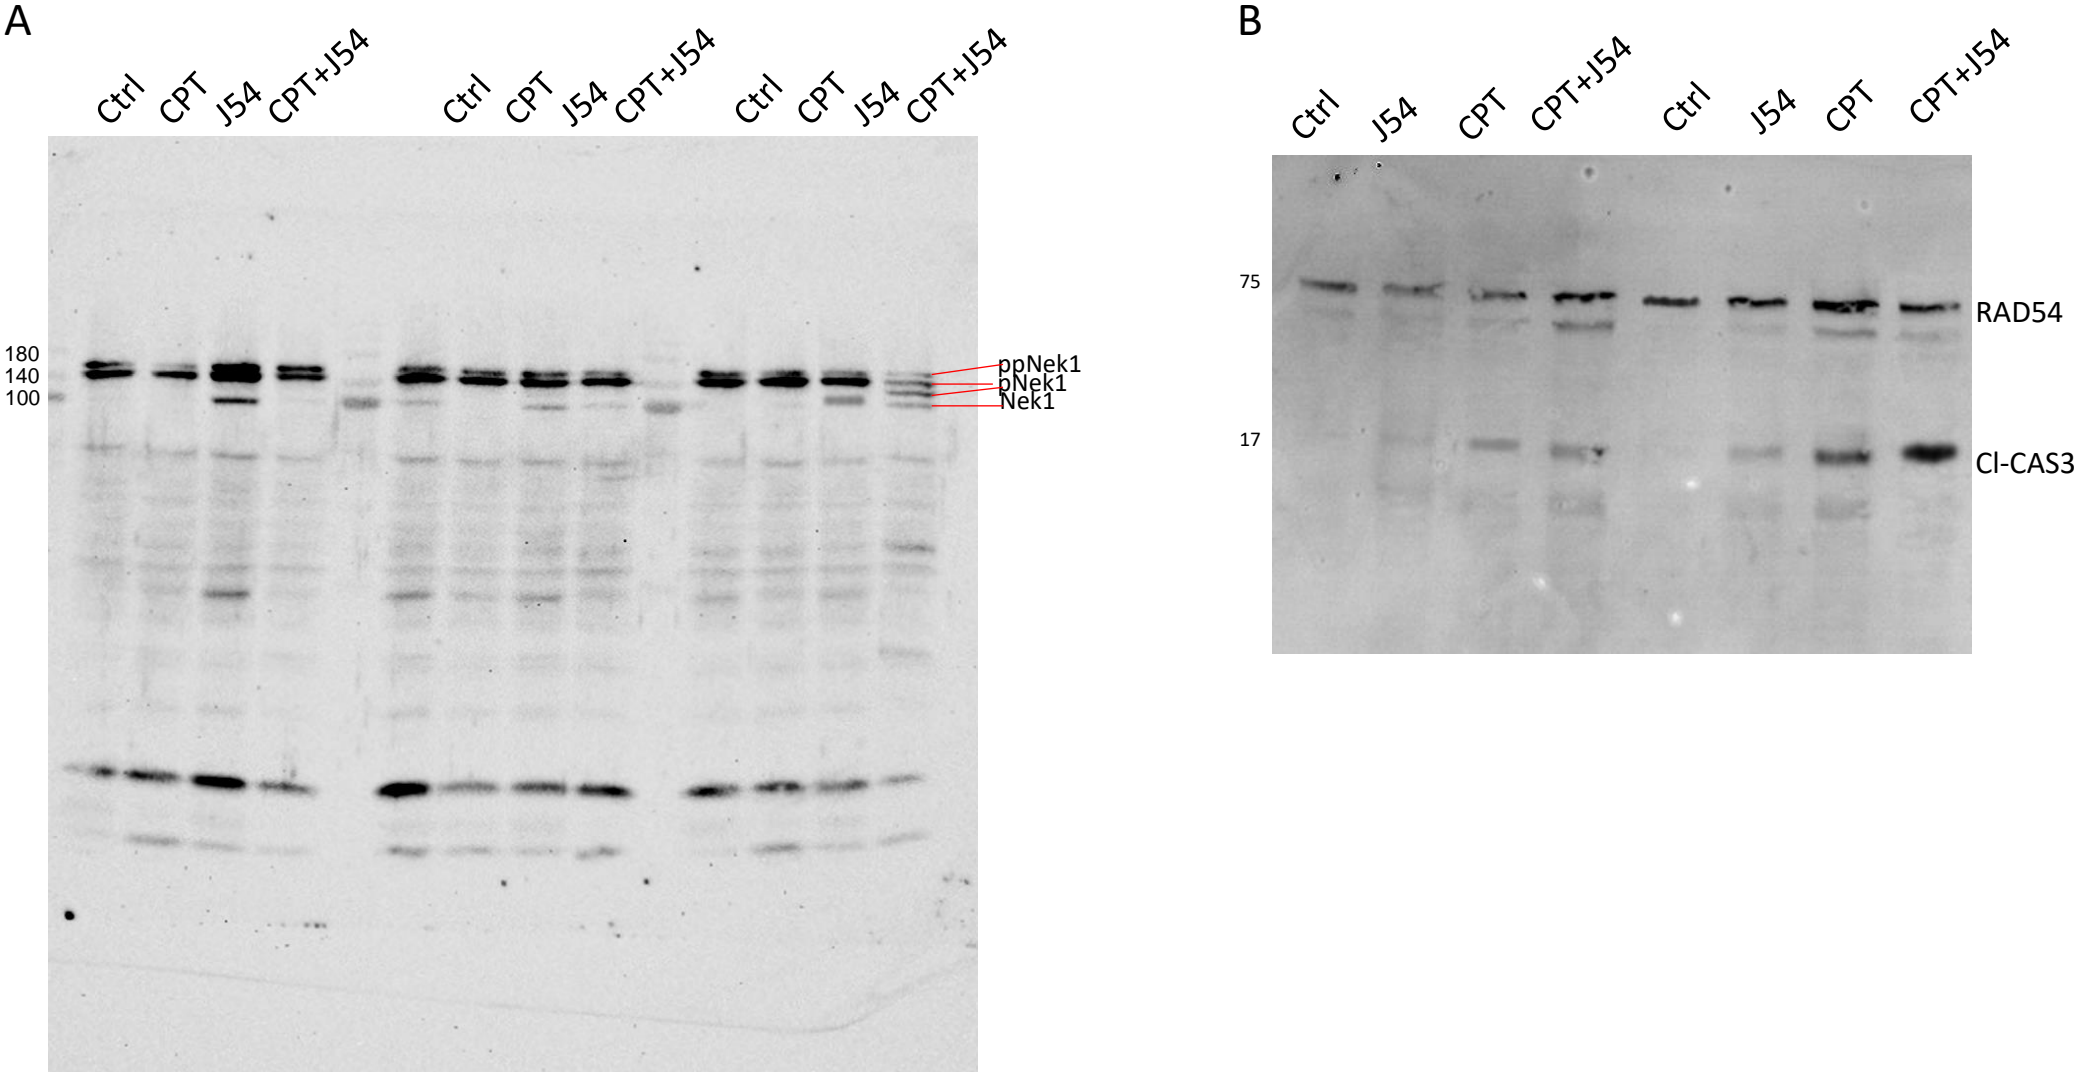

Figure S3.

Phospho-RAD54 status in tumors from the treatment groups

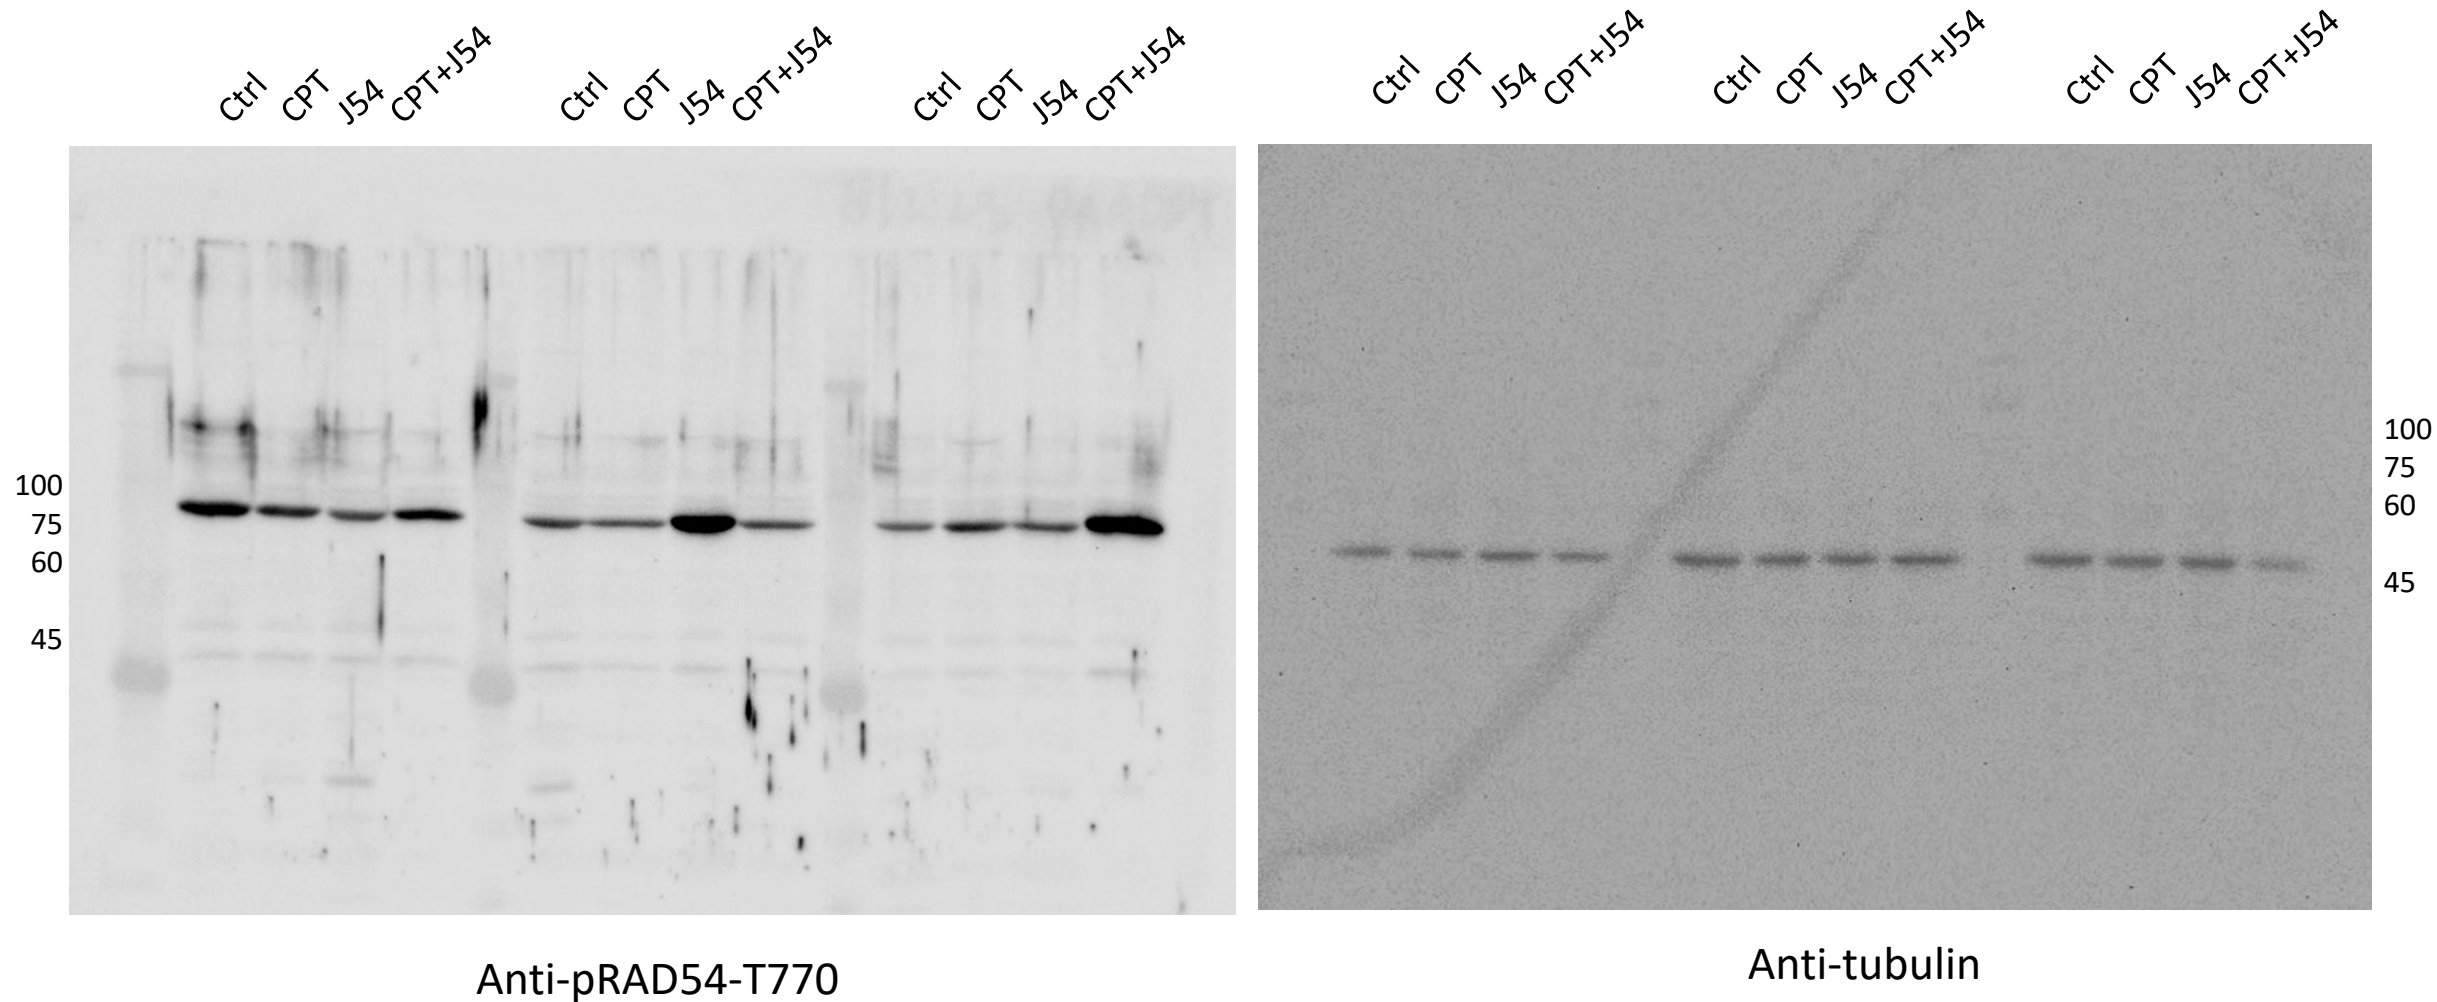

# Figure S4

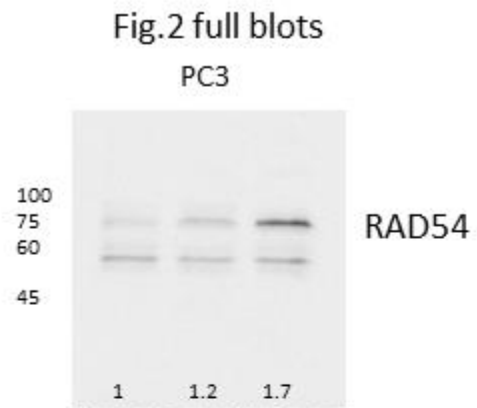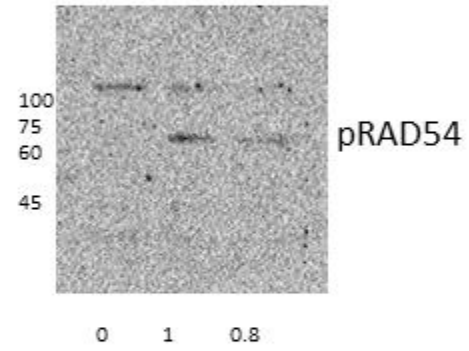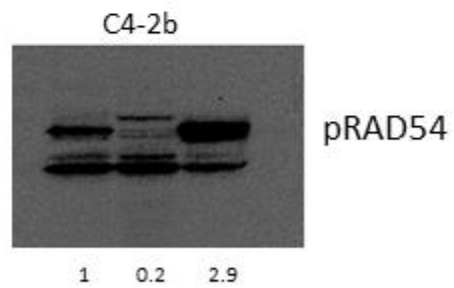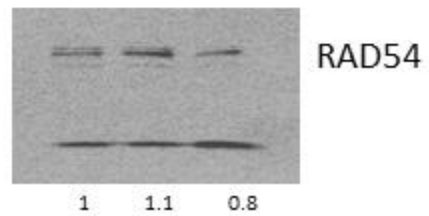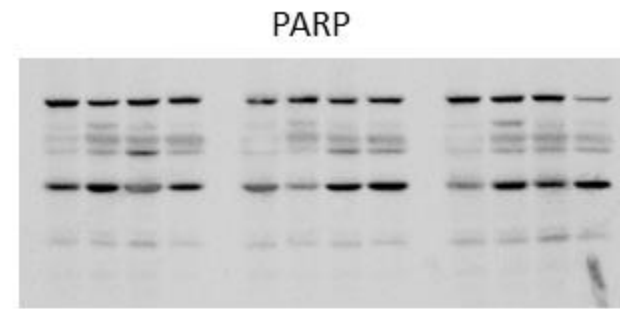

| 1   | 2 | 3   | 4   | band    |
|-----|---|-----|-----|---------|
| 1   | 1 | 1   | 0.4 | FL-PARP |
| 0.2 | 1 | 0.3 | 0.3 | CI-P1   |
| 0.1 | 1 | 1.2 | 1   | CI-P2   |
| 0.1 | 1 | 1   | 1   | CI-P3   |

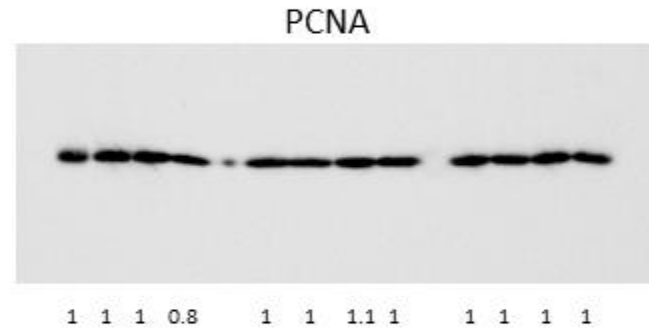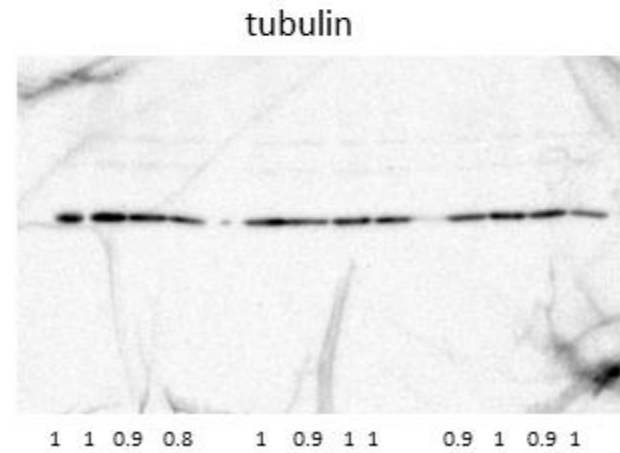

Fig.4 full blots

SI-FIG.3

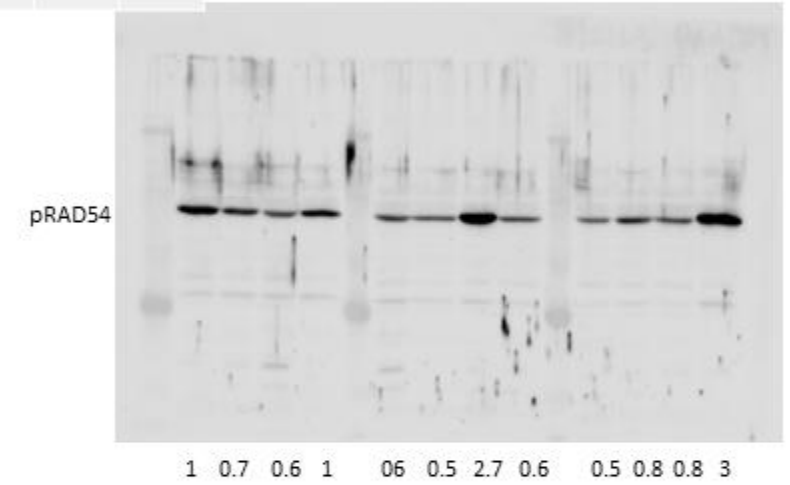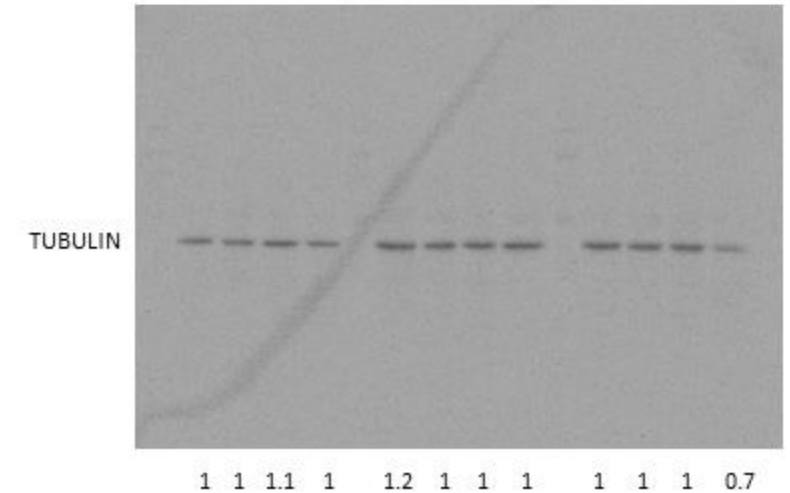

Figure S5

# Selected Statistical SI data

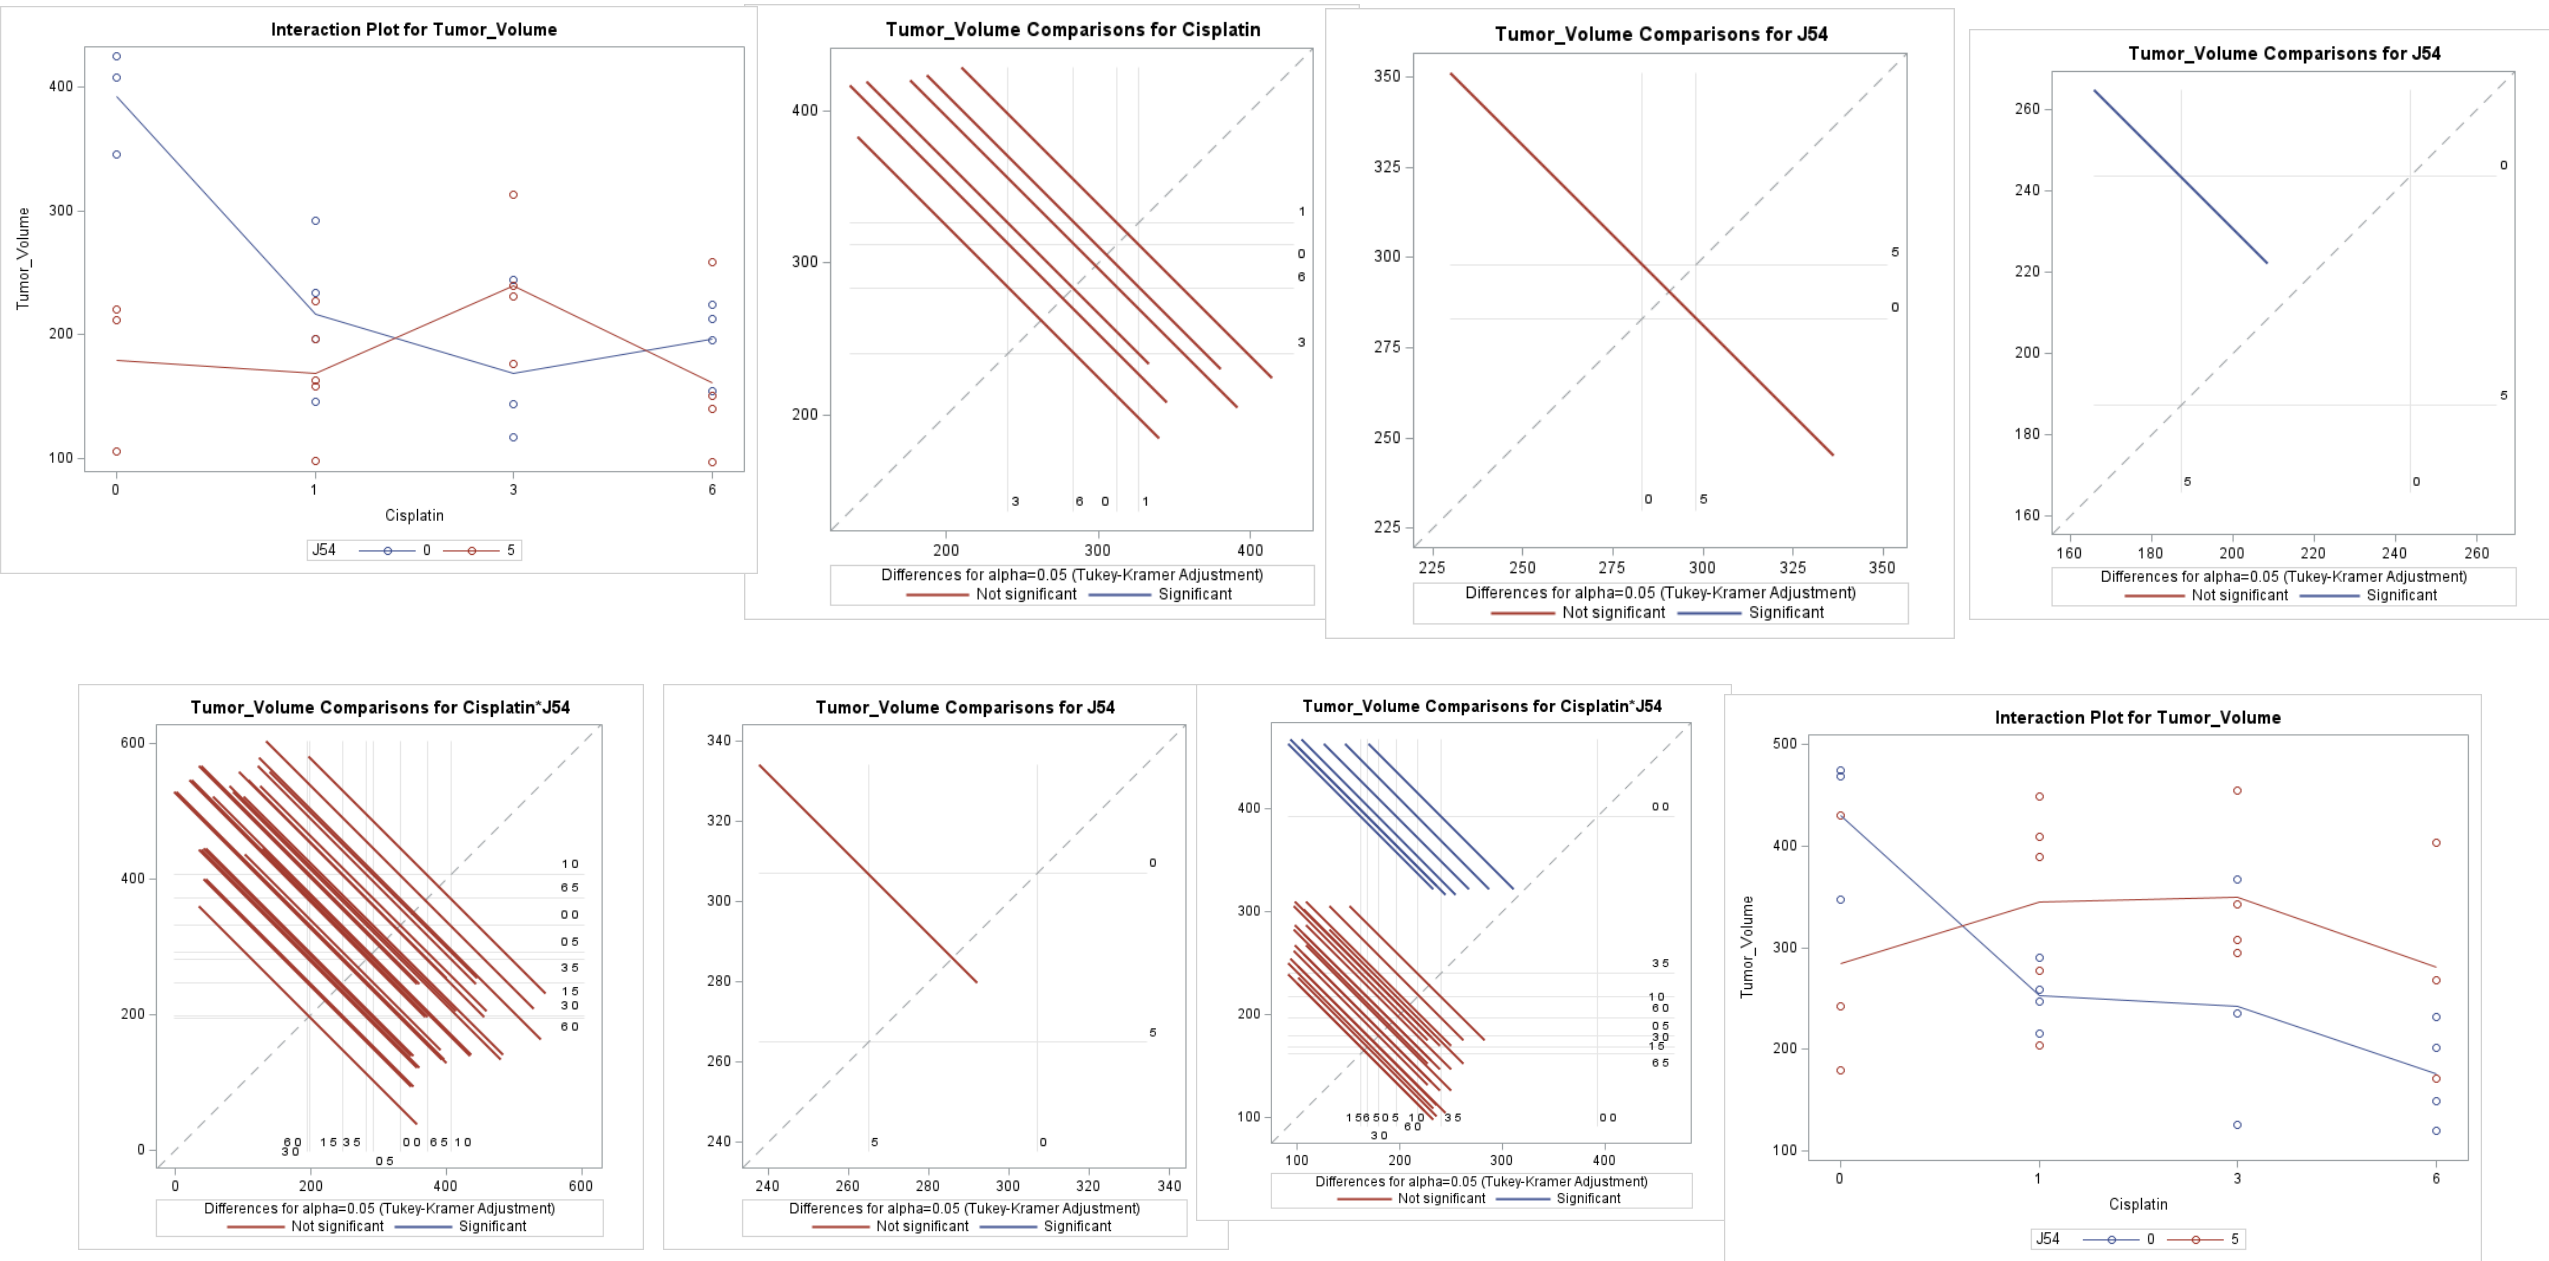

Supplement: s1 [file s1]
